# Supplementary figures and images for: RNA modification writer expression profiles predict clinical outcomes and guide neoadjuvant immunotherapy in non-small cell lung cancer
Source: PubMed Central journal article supplement — eBioMedicine. 2022 Sep 15;84:104268. doi: 10.1016/j.ebiom.2022.104268 (PMC9486036; doi:10.1016/j.ebiom.2022.104268), 2022-09-15

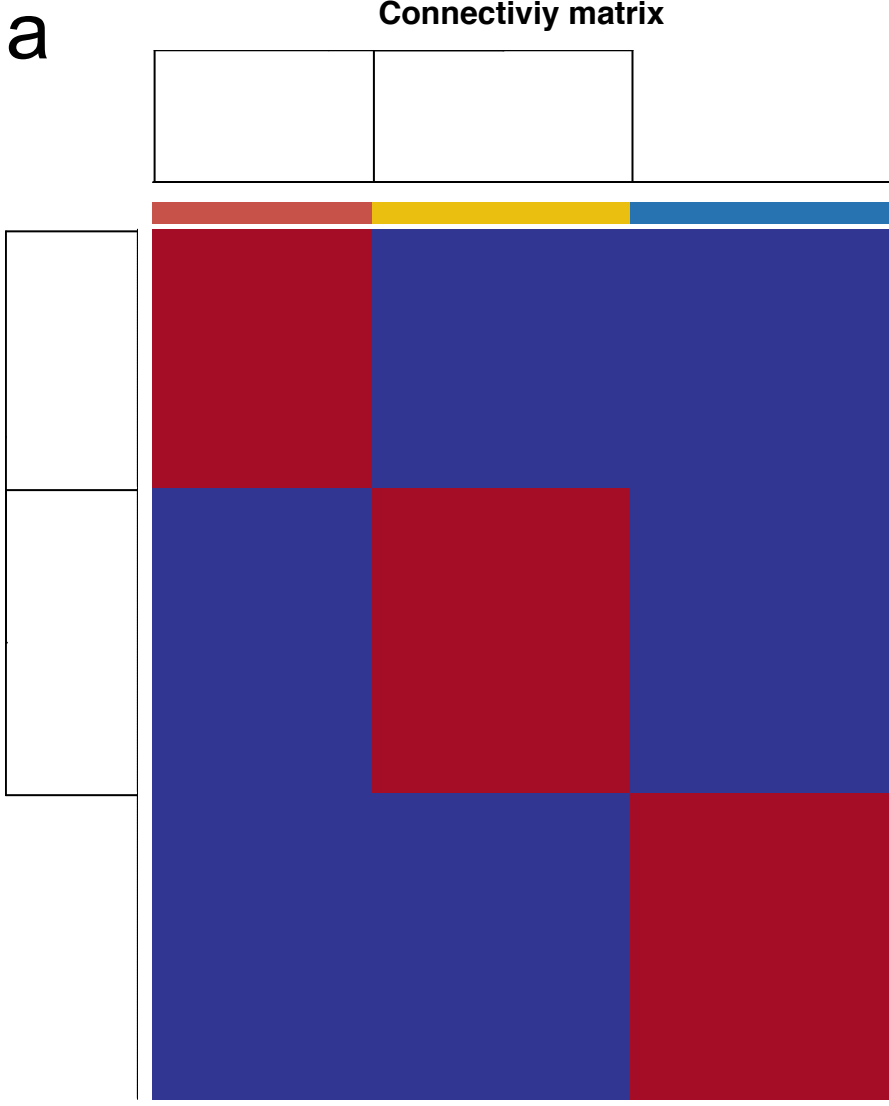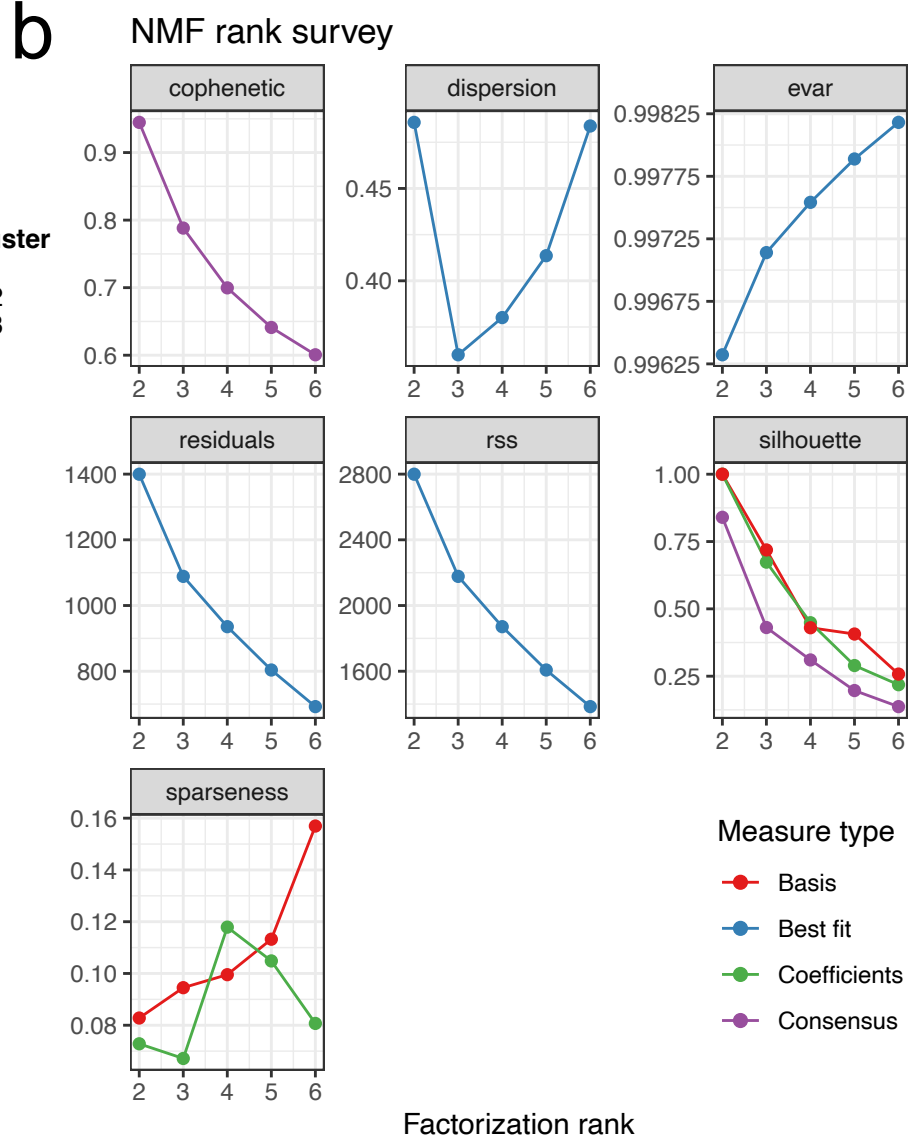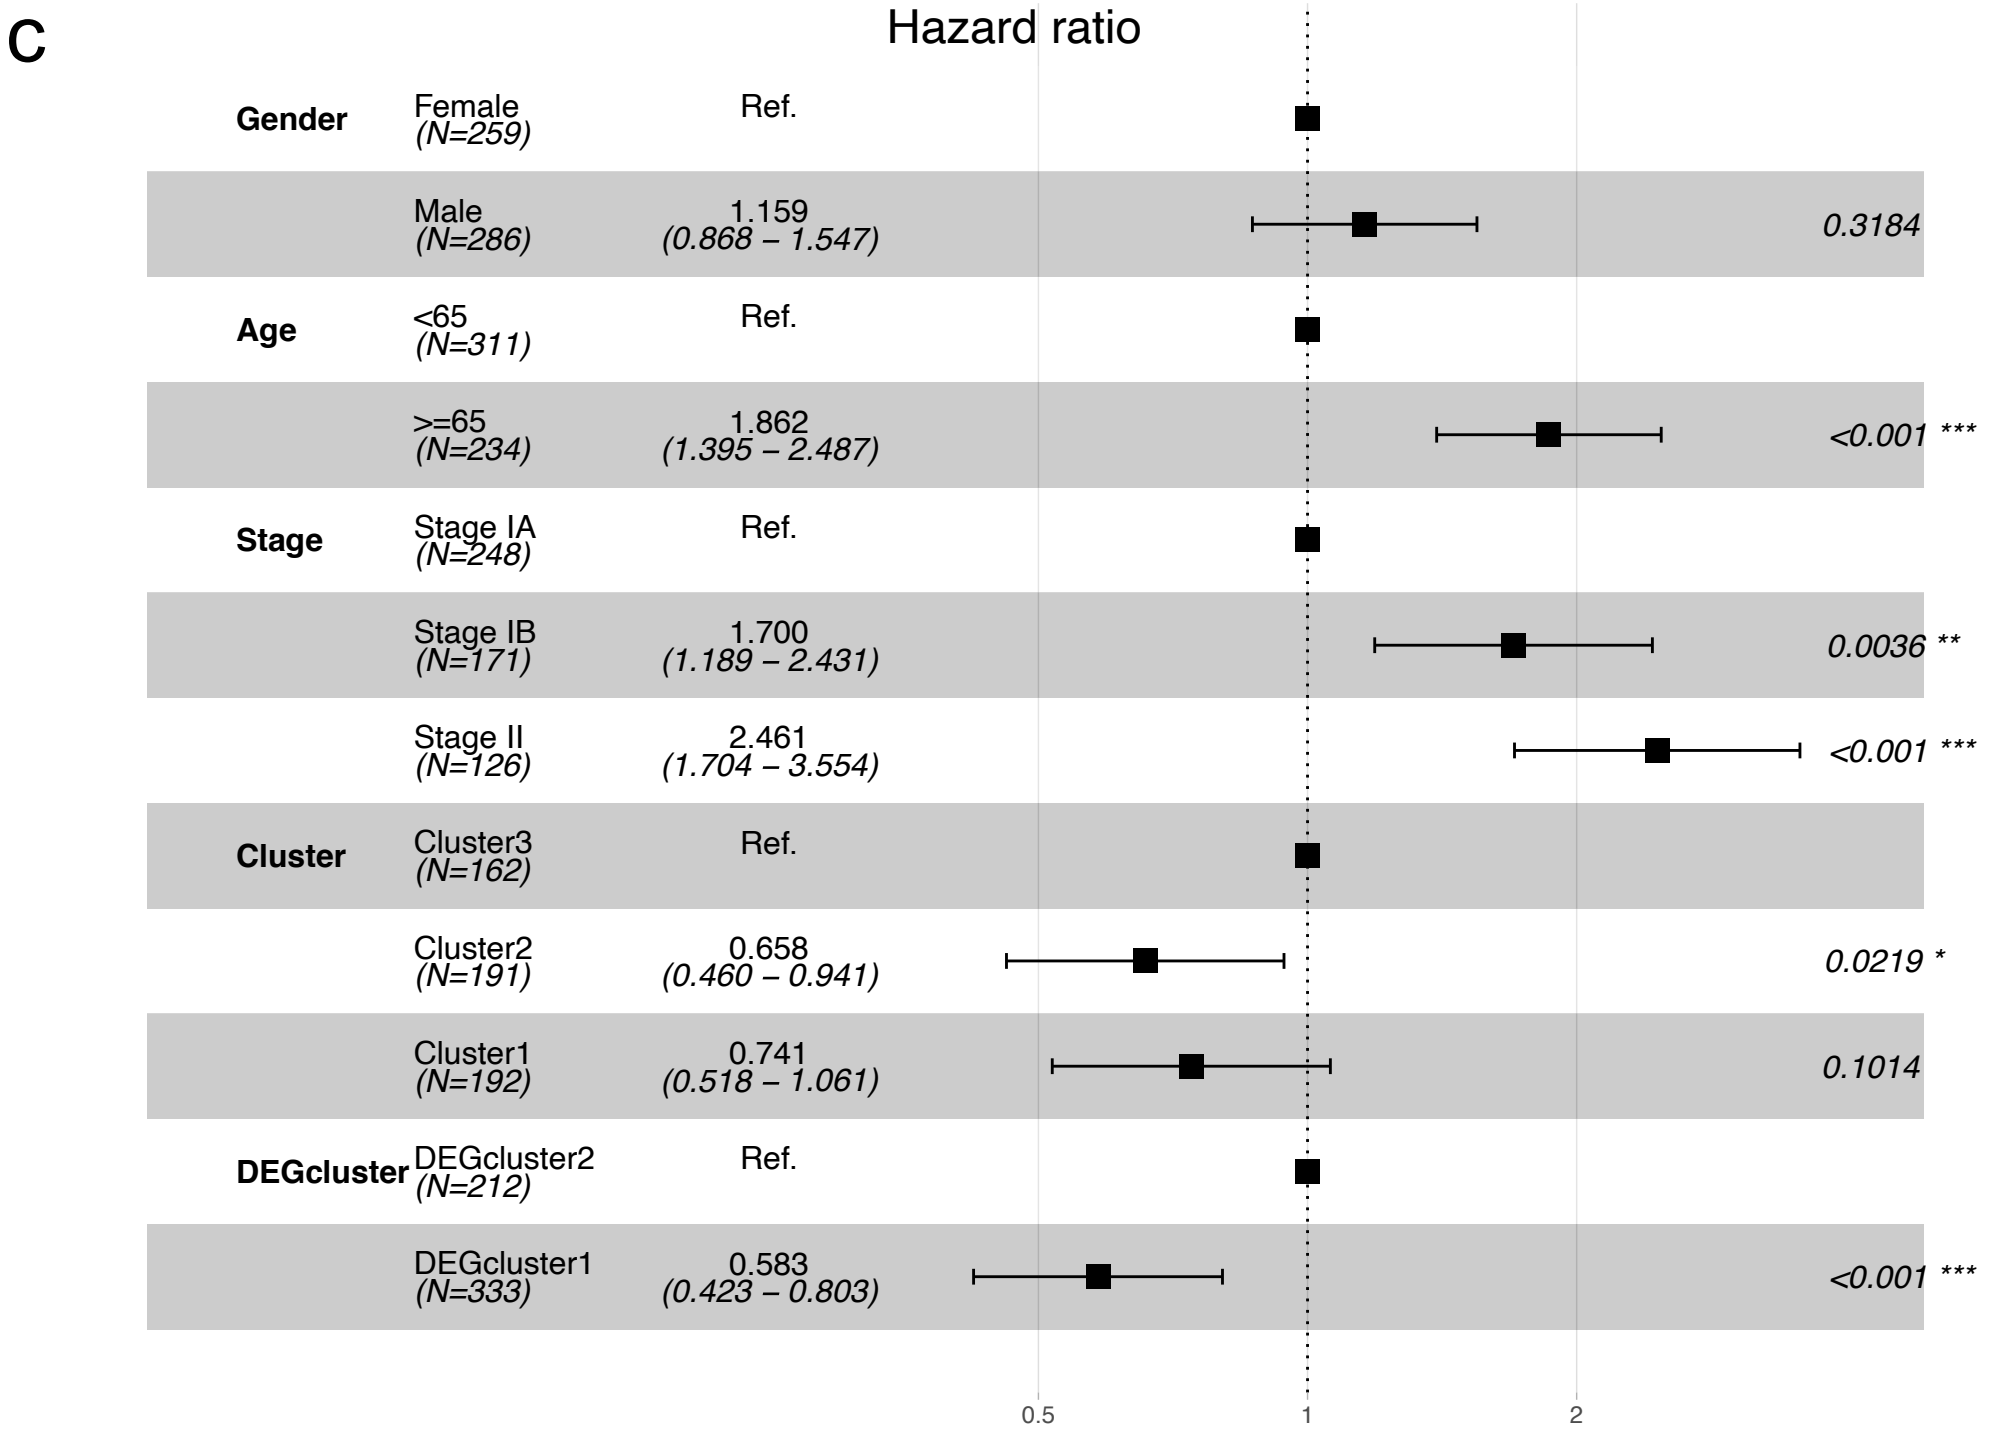

Connectivity matrix

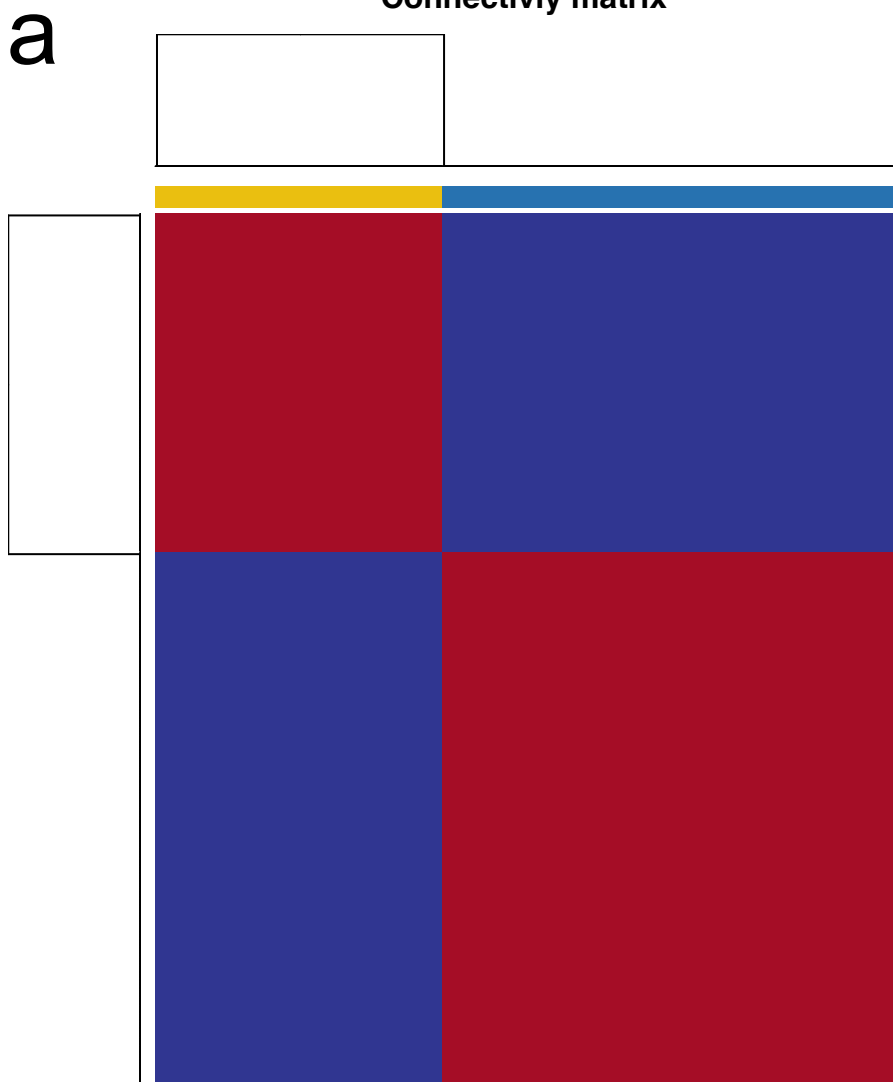

NMF rank survey

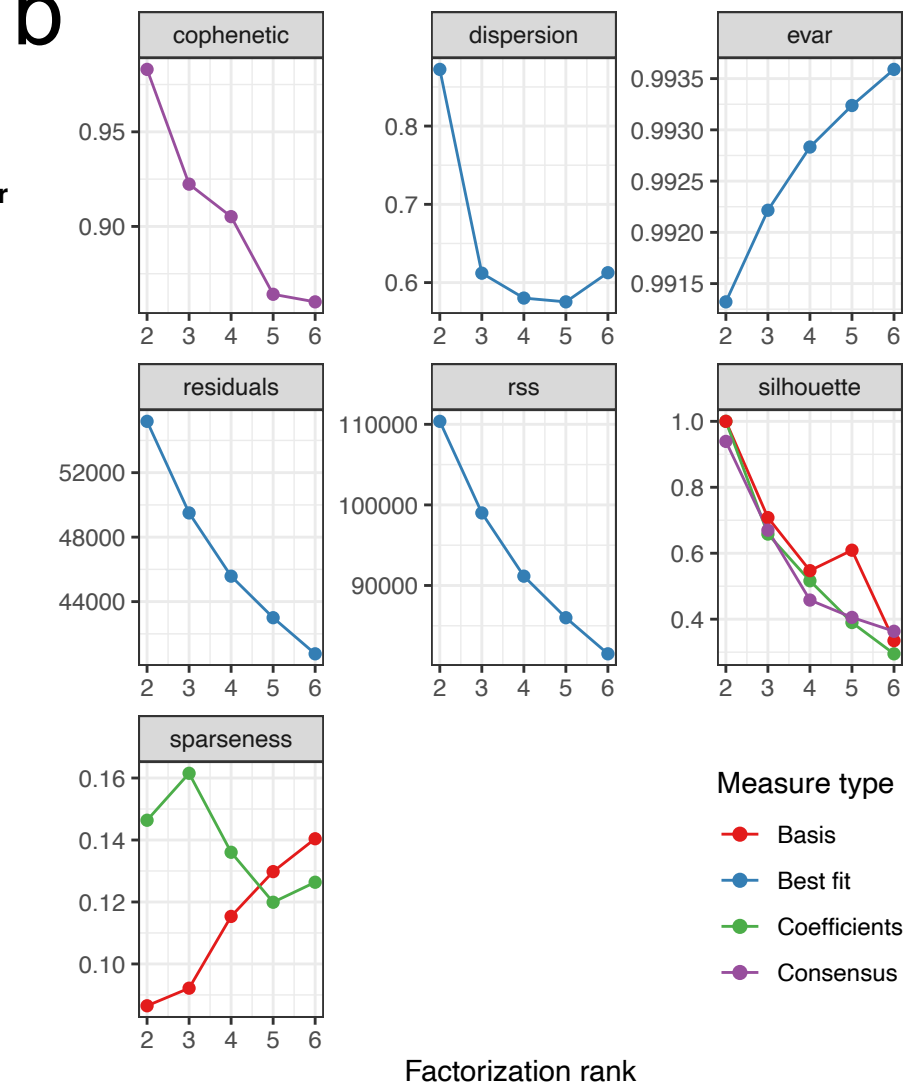**c**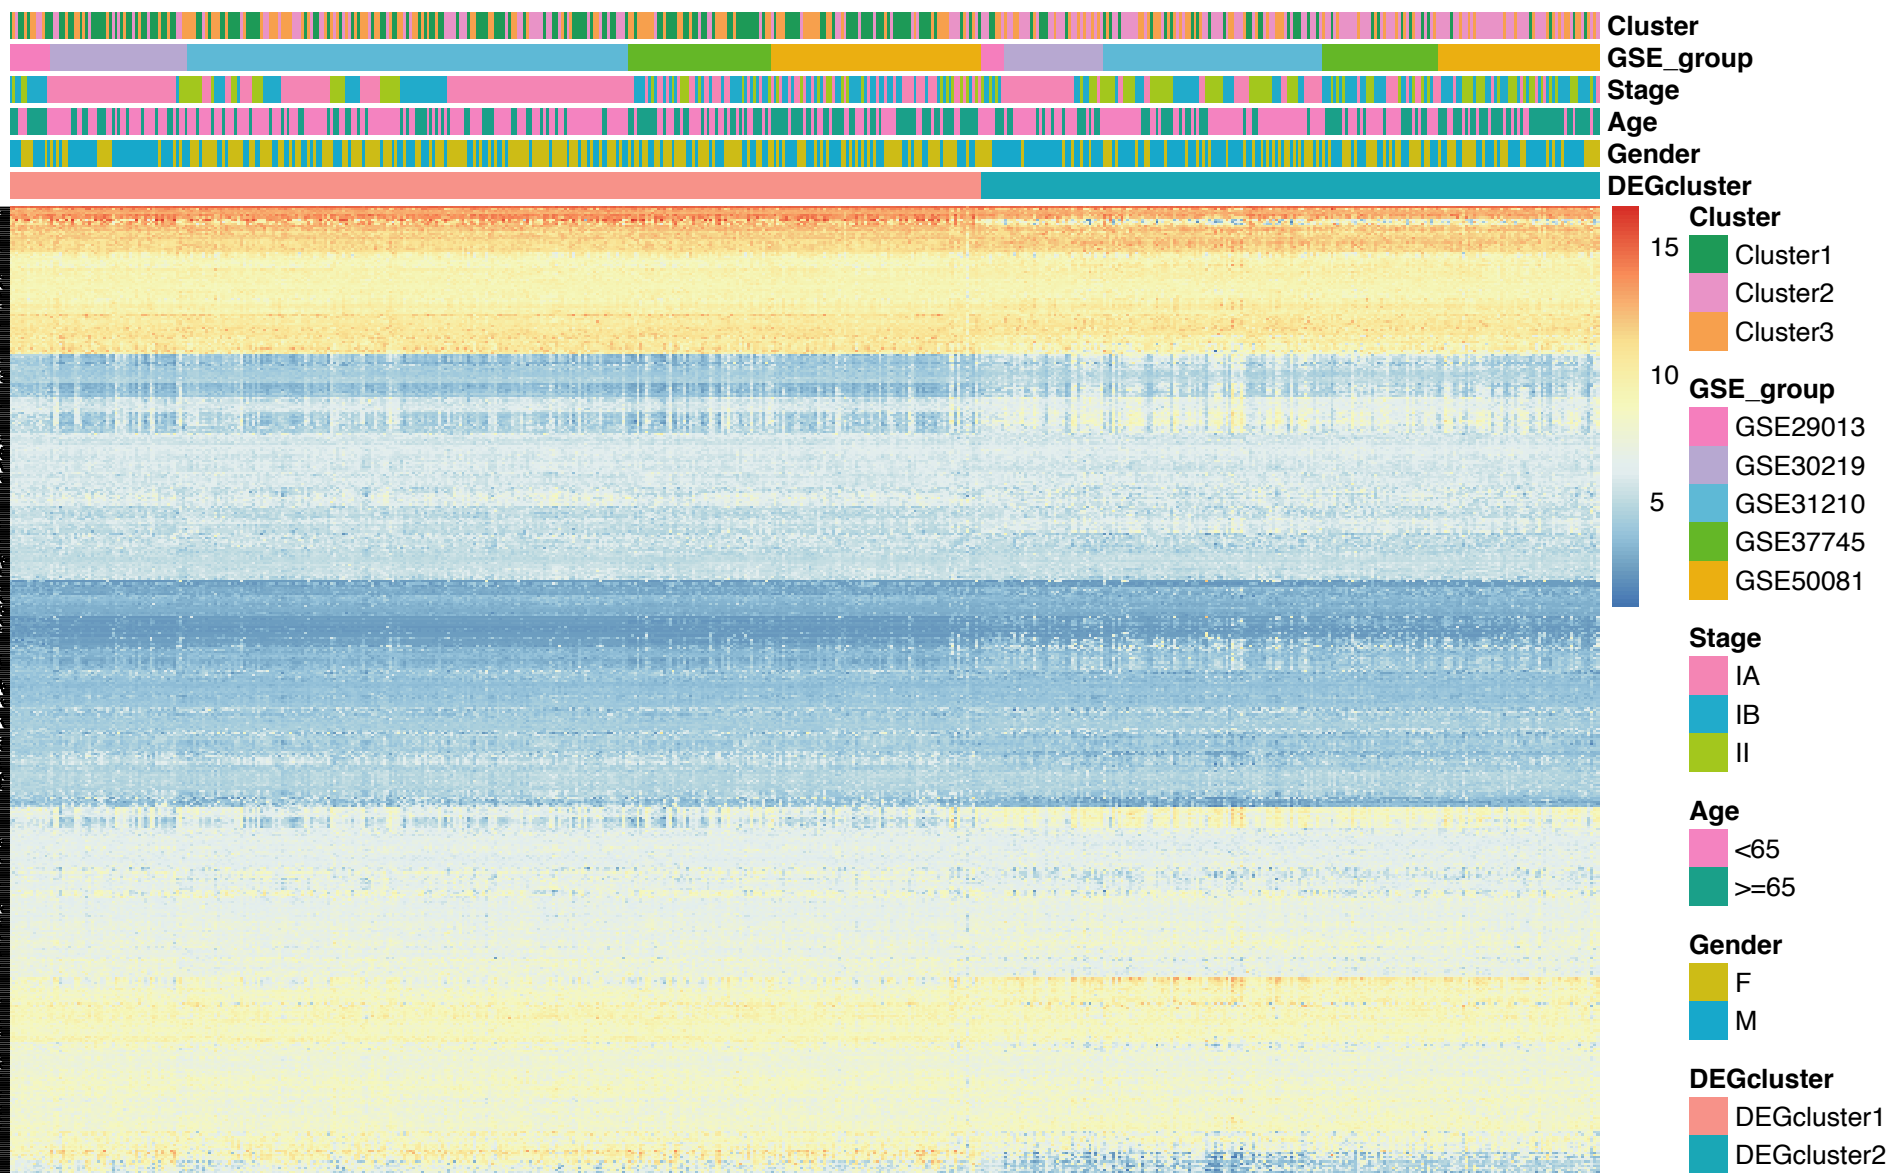

Supplement: mmc1.pdf [file mmc1.pdf]
